# Supplementary material for: Drug-Associated Parosmia: New Perspectives from the WHO Safety Database
Source: MDPI journal article supplement (doi:10.3390/jcm11164641), 2022-08-09
Supplement: s1 [file s1]

**Table S1.** Reported suspected drugs in patients with parosmia

| <b>Drugs</b>            | <b>Number (%)</b>   |
|-------------------------|---------------------|
| <b>COVID-19 vaccine</b> | <b>3,796 (27.1)</b> |
| Tozinameran             | 2,103 (55.4)        |
| Elasomeran              | 745 (19.6)          |
| AZD1222                 | 724 (19.1)          |
| JNJ 78436735            | 191 (5.0)           |
| Others                  | 33 (0.9)            |
| Clarithromycin          | 288 (2.1)           |
| Varenicline             | 245 (1.7)           |
| Fluticasone             | 223 (1.6)           |
| Azithromycin            | 152 (1.1)           |
| Beclometasone           | 145 (1.1)           |
| Adalimumab              | 131 (0.9)           |
| Roxithromycin           | 125 (0.9)           |
| Ribavirin               | 121 (0.9)           |
| Terbinafine             | 121 (0.9)           |
| Ciprofloxacin           | 119 (0.8)           |
| Ipratropium             | 113 (0.8)           |
| Mometasone              | 106 (0.8)           |
| HPV vaccine             | 106 (0.8)           |
| Etanercept              | 101 (0.7)           |
| Levofloxacin            | 100 (0.7)           |
| Oxymetazoline           | 99 (0.7)            |
| Moxifloxacin            | 95 (0.7)            |
| Teriparatide            | 95 (0.7)            |
| Ofloxacin               | 91 (0.6)            |
| Flunisolide             | 83 (0.6)            |
| Duloxetine              | 82 (0.6)            |
| Lenalidomide            | 82 (0.6)            |
| Bupropion               | 81 (0.6)            |
| Salbutamol              | 78 (0.6)            |
| Doxycycline             | 78 (0.6)            |
| Influenza vaccine       | 75 (0.5)            |
| Exenatide               | 71 (0.5)            |
| Omeprazole              | 70 (0.5)            |
| Levonorgestrel          | 70 (0.5)            |
| Paroxetine              | 66 (0.5)            |
| Metronidazole           | 60 (0.4)            |
| Levothyroxine           | 58 (0.4)            |
| Fumaric acid            | 57 (0.4)            |
| Atorvastatin            | 56 (0.4)            |
| Pregabalin              | 56 (0.4)            |
| Peginterferon alfa-2b   | 55 (0.4)            |
| Peginterferon alfa-2a   | 54 (0.4)            |
| Nicotine                | 52 (0.4)            |
| Telaprevir              | 52 (0.4)            |
| Metformin               | 50 (0.4)            |
| Venlafaxine             | 49 (0.3)            |

|                             |          |
|-----------------------------|----------|
| Sertraline                  | 48 (0.3) |
| Palbociclib                 | 47 (0.3) |
| Amoxicillin                 | 46 (0.3) |
| Fluorouracil                | 46 (0.3) |
| Paracetamol                 | 45 (0.3) |
| Methotrexate                | 45 (0.3) |
| Fluoxetine                  | 45 (0.3) |
| Budesonide                  | 45 (0.3) |
| Fentanyl                    | 44 (0.3) |
| Captopril                   | 43 (0.3) |
| Lamotrigine                 | 42 (0.3) |
| Pirfenidone                 | 41 (0.3) |
| Gabapentin                  | 40 (0.3) |
| Tramadol                    | 40 (0.3) |
| Dulaglutide                 | 40 (0.3) |
| Clonazepam                  | 39 (0.3) |
| Lovastatin                  | 39 (0.3) |
| Triamcinolone               | 38 (0.3) |
| Natalizumab                 | 37 (0.3) |
| Apremilast                  | 37 (0.3) |
| Dupilumab                   | 37 (0.3) |
| Quetiapine                  | 36 (0.3) |
| Amoxicillin;Clavulanic acid | 36 (0.3) |
| Simvastatin                 | 35 (0.2) |
| Budesonide;Formoterol       | 35 (0.2) |
| Valproic acid               | 35 (0.2) |
| Interferon beta-1a          | 35 (0.2) |
| Cromoglicic acid            | 34 (0.2) |
| Amlodipine                  | 33 (0.2) |
| Tiotropium                  | 33 (0.2) |
| Alendronic acid             | 33 (0.2) |
| Metamizole                  | 32 (0.2) |
| Prednisone                  | 31 (0.2) |
| Cetirizine                  | 31 (0.2) |
| Fluticasone;Salmeterol      | 31 (0.2) |
| Citalopram                  | 31 (0.2) |
| Enalapril                   | 31 (0.2) |
| Levetiracetam               | 31 (0.2) |
| Cyclophosphamide            | 31 (0.2) |
| Lisinopril                  | 30 (0.2) |
| Rosuvastatin                | 30 (0.2) |
| Clindamycin                 | 30 (0.2) |
| Liraglutide                 | 30 (0.2) |
